# Supplementary material for: Integrierte Notfallzentren: eine Lösung zur Patientensteuerung?
Source: Springer Nature journal article supplement (doi:10.1007/s10049-022-00998-x), 2022-03-29
Supplement: MOESM1 [file 20263440]

**Demografische Daten**

|                                                                                                                                                    |                                                                                                                                                    |                                                                           |                                                                             |                                                                                |                                                                            |
|----------------------------------------------------------------------------------------------------------------------------------------------------|----------------------------------------------------------------------------------------------------------------------------------------------------|---------------------------------------------------------------------------|-----------------------------------------------------------------------------|--------------------------------------------------------------------------------|----------------------------------------------------------------------------|
| 1. Wo liegt Ihre Notaufnahme?                                                                                                                      | <input type="checkbox"/><br>Ort:<br>weniger<br>als 2.000<br>Einwohner                                                                              | <input type="checkbox"/><br>Landstadt:<br>2.000 bis<br>5.000<br>Einwohner | <input type="checkbox"/><br>Kleinstadt:<br>5.000 bis<br>20.000<br>Einwohner | <input type="checkbox"/><br>Mittelstadt:<br>20.000 bis<br>100.000<br>Einwohner | <input type="checkbox"/><br>Großstadt:<br>mehr als<br>100.000<br>Einwohner |
| 2. Welcher Notfallstufe wird Ihr Haus angehören?                                                                                                   | <input type="checkbox"/><br>keiner                                                                                                                 | <input type="checkbox"/><br>1                                             | <input type="checkbox"/><br>2                                               | <input type="checkbox"/><br>3                                                  | <input type="checkbox"/><br>keine<br>Antwort                               |
| 3. Handelt es sich bei Ihrer Notaufnahme um eine Abteilung mit zugehörigem ärztlichen und pflegerischen Personal und mit einer 24/7 Verfügbarkeit? | <input type="checkbox"/><br>Ja                                                                                                                     |                                                                           | <input type="checkbox"/><br>Nein                                            |                                                                                |                                                                            |
| 4. Existiert in Ihrem Haus bereits eine KV-Praxis?                                                                                                 | <input type="checkbox"/><br>Ja                                                                                                                     |                                                                           | <input type="checkbox"/><br>Nein                                            |                                                                                |                                                                            |
| 5. Existiert in Ihrem Haus bereits ein INZ?                                                                                                        | Integrierte Notfallzentren mit dem sogenannten „ein Tresen-Prinzip“ wodurch die Behandlungsdringlichkeit und der Versorgungsort festgelegt werden. |                                                                           |                                                                             |                                                                                |                                                                            |
|                                                                                                                                                    | <input type="checkbox"/><br>Ja                                                                                                                     |                                                                           | <input type="checkbox"/><br>Nein                                            |                                                                                |                                                                            |
| 6. Welche Leitungsfunktion haben Sie inne?                                                                                                         | <input type="checkbox"/><br>ärztlich                                                                                                               | <input type="checkbox"/><br>PDL                                           | <input type="checkbox"/><br>pflegerische<br>Bereichsleitung                 | <input type="checkbox"/><br>pflegerische<br>Stationsleitung                    | <input type="checkbox"/><br>Sonstige:<br>_____                             |

**Mögliche Gründe**

|     |                                                                                                                          | Stimme gar nicht zu | Stimme nicht zu | Stimme zu | Stimme voll zu |
|-----|--------------------------------------------------------------------------------------------------------------------------|---------------------|-----------------|-----------|----------------|
| 7.  | Patienten suchen die Notaufnahme auf, da sie die Strukturen der Notfallversorgung nicht kennen.                          |                     |                 |           |                |
| 8.  | Overcrowding kann zu erhöhter Mortalität und Morbidität von Patienten führen.                                            |                     |                 |           |                |
| 9.  | INZ führen zum Abbau von Doppelstrukturen (z.B. doppelte Anamnese/ Diagnostik).                                          |                     |                 |           |                |
| 10. | INZ führen zu einer besseren Verzahnung der Notfallversorgung (Rettungsdienst, KV-Bereitschaftsdienst, Notaufnahme, ...) |                     |                 |           |                |
| 11. | INZ führen zu einer bedarfsgerechten Versorgung.                                                                         |                     |                 |           |                |
| 12. | INZ führen zu einem effizienteren Einsatz von Ressourcen.                                                                |                     |                 |           |                |

13. Inwiefern denken Sie führen INZ zu einem effizienteren Einsatz von Ressourcen?

---



---



---

**Mögliche Ziele**

|     |                                                                                                              |  |  |  |  |
|-----|--------------------------------------------------------------------------------------------------------------|--|--|--|--|
| 14. | INZ führen in die Richtung einer hochprofessionellen notfallmedizinischen Versorgung.                        |  |  |  |  |
| 15. | INZ führen zu einer effizienteren Versorgung, da sie Kosten und Aufwand einsparen.                           |  |  |  |  |
| 16. | INZ führen zu einer qualitativ besseren Versorgung und tragen zu Versorgungssicherheit des Patienten bei.    |  |  |  |  |
| 17. | Im Sinne des Gesetzes ist es Ziel, dass INZ den Patienten direkt zur richtigen Stelle der Versorgung leiten. |  |  |  |  |
| 18. | Begründen Sie bitte Ihre Antwort: _____<br>_____                                                             |  |  |  |  |
| 19. | Die Zufriedenheit der Patienten und Mitarbeiter wird durch INZ verbessert.                                   |  |  |  |  |
| 20. | Durch INZ werden Wartezeiten verkürzt.                                                                       |  |  |  |  |
| 21. | Die Vertragsärztliche Notfallversorgung soll zukünftig 24 Stunden, 7 Tage die Woche gewährleistet werden.    |  |  |  |  |
| 22. | Der KV-Bereitschaftsdienst und Notfallaufnahmen sollen enger verzahnt werden.                                |  |  |  |  |

23. Welche weiteren Ziele sehen Sie für die Etablierung von INZs?

---



---



---

**Mögliche Voraussetzungen**

|     |                                                                                                                                                                                                                                                                              |  |  |  |  |
|-----|------------------------------------------------------------------------------------------------------------------------------------------------------------------------------------------------------------------------------------------------------------------------------|--|--|--|--|
| 24. | INZ setzen eine Zusammenarbeit aller Beteiligten (KV-Bereitschaftsdienst, Rettungsdienst, Notaufnahme) voraus.                                                                                                                                                               |  |  |  |  |
| 25. | Eine digitale Vernetzung aller Beteiligten (KV-Bereitschaftsdienst, Rettungsdienst, Notaufnahme) ist notwendig.                                                                                                                                                              |  |  |  |  |
| 26. | Eine einheitliche Dokumentation und eng verzahnte Strukturen zwischen Notaufnahme und KV-Praxis sind notwendig.                                                                                                                                                              |  |  |  |  |
| 27. | In den INZ muss eine validierte Ersteinschätzung durchgeführt werden.                                                                                                                                                                                                        |  |  |  |  |
| 28. | Eine Triagierung durch MTS oder ESI dient der optimalen Patientensteuerung in INZ.                                                                                                                                                                                           |  |  |  |  |
| 29. | Durch die Triage werden Hochrisikopatienten identifiziert.                                                                                                                                                                                                                   |  |  |  |  |
| 30. | Die Ersteinschätzung kann durch einen...<br><input type="checkbox"/> erfahrenen Facharzt durchgeführt werden.<br><input type="checkbox"/> erfahrenen Notfallpflegenden durchgeführt werden.                                                                                  |  |  |  |  |
| 31. | INZ sollen über Krankenhäuser organisiert werden.                                                                                                                                                                                                                            |  |  |  |  |
| 32. | Unter welcher Leitung sollen INZ stehen?<br><input type="checkbox"/> Arzt der kassenärztlichen Vereinigung<br><input type="checkbox"/> Notfallmediziner des Krankenhauses<br><input type="checkbox"/> Gemeinsamer Leitung von KV-Arzt und Notfallmediziner des Krankenhauses |  |  |  |  |
| 33. | INZ-Standort-Festlegung führt zu einer Balance zwischen Zentralisierung und flächendeckender Versorgung.                                                                                                                                                                     |  |  |  |  |
| 34. | Ein finanzieller Anreiz für INZ darf nicht bestehen.                                                                                                                                                                                                                         |  |  |  |  |
| 35. | INZ stellen einen pflegesensitiven Bereich dar, in dem Notfallpflegende arbeiten sollten.                                                                                                                                                                                    |  |  |  |  |
| 36. | Angemessene Personalbemessungsmodelle in INZ müssen entwickelt werden.                                                                                                                                                                                                       |  |  |  |  |
| 37. | Gesetzliche Vorgaben für eine integrative und sektorenübergreifende Notfallversorgung müssen geschaffen werden.                                                                                                                                                              |  |  |  |  |
| 38. | Notfallstrukturen inklusive INZ müssen für den Patienten transparent gestaltet werden.                                                                                                                                                                                       |  |  |  |  |

39. Welche weiteren Voraussetzungen müssen erfüllt sein, damit die Notfallversorgung mit Hilfe Integrierter Notfallzentren gewährleistet werden kann?

---



---



---

**Mögliche Gefahren**

|     |                                                                                                                                |  |  |  |  |
|-----|--------------------------------------------------------------------------------------------------------------------------------|--|--|--|--|
| 40. | Durch die Etablierung von INZ wird ein dritter Versorgungssektor eröffnet.                                                     |  |  |  |  |
| 41. | INZ führen zu neuen Schnittstellenproblemen (zwischen INZ, ZNA, KV-Bereitschaftsdienst, Rettungsdienst, ...).                  |  |  |  |  |
| 42. | INZ unterstützen Selbsteinweiser.                                                                                              |  |  |  |  |
| 43. | Die Auswahl des Versorgungsortes auf Grundlage einer vorgelagerten Dringlichkeitseinstufung gefährdet die Patientensicherheit. |  |  |  |  |
| 44. | Patienten suchen vermehrt das INZ auf, da sie dort eine schnelle und umfassende Versorgung erwarten.                           |  |  |  |  |
| 45. | Durch INZ besteht die Gefahr, dass die Anzahl der Notaufnahmen abgebaut werden.                                                |  |  |  |  |

46. Welche weiteren Gefahren sehen Sie bei der Einführung von Integrierten Notfallzentren?

---



---



---

**Mögliche Kritik**

|     |                                                                                                             |  |  |  |  |
|-----|-------------------------------------------------------------------------------------------------------------|--|--|--|--|
| 47. | INZ stellen keine Lösung der Patientensteuerung dar.                                                        |  |  |  |  |
| 48. | Nur Krankenhäuser können Bereitschafts- und Notfallversorgung gewährleisten.                                |  |  |  |  |
| 49. | Notaufnahme generieren Patientenfälle für das Krankenhaus. Durch INZ könnten Patientenfälle verloren gehen. |  |  |  |  |
| 50. | Die Kassenärztlichen Vereinigungen sind nicht in der Lage über eine stationäre Aufnahme zu entscheiden.     |  |  |  |  |
| 51. | INZ führen zur Zeitverzögerung bei kritischen Patienten.                                                    |  |  |  |  |
| 52. | INZ stellen nur eine Lösung für große Kliniken dar.                                                         |  |  |  |  |

53. Welche weitere Kritik gibt es?

---



---



---

54. Welche Aspekte möchten Sie bezüglich Integrierter Notfallzentren noch äußern?

---



---



---

|                                                                              |                                |                                  |
|------------------------------------------------------------------------------|--------------------------------|----------------------------------|
| 55. Halten Sie die Etablierung von Integrierten Notfallzentren für sinnvoll? | <input type="checkbox"/><br>Ja | <input type="checkbox"/><br>Nein |
|------------------------------------------------------------------------------|--------------------------------|----------------------------------|
